# Supplementary material for: Urinary exosomal CD26 is associated with recovery from acute kidney injury in intensive care units: a prospective cohort study
Source: publisher site journal article supplement (doi:10.1515/cclm-2021-0040), 2021-04-22
Supplement: Supplementary file 1 [file j_cclm-2021-0040_suppl_007.doc]

**Supplemental Material 7**

Cox Model for *reversa*l in acute kidney injury patients

| **Variables** | **Log Rank test** | **Cox model** | | | |
| --- | --- | --- | --- | --- | --- |
| **p** | | **HR (95% CI)** | | **p** |
| Age (≥60y vs. <60y) | 0.028 b | | 0.44 (0.26-0.73) | 0.001 | |
| Gender (male) | 0.431 | |  |  | |
| Non-renal APACHE II score  (≥19 vs. <19) | 0.005 b | |  |  | |
| Hypertension | 0.192 | |  |  | |
| Diabetes | 0.181 | |  |  | |
| Cardiovascular disease | 0.114 | |  |  | |
| Stroke | 0.375 | |  |  | |
| Chronic kidney disease | 0.049 b | |  |  | |
| COPD | 0.147 | |  |  | |
| Liver cirrhosis | 0.191 | |  |  | |
| Suspected sepsis | 0.155 | |  |  | |
| Cardiovascular events | 0.003 b | |  |  | |
| Trauma | 0.959 | |  |  | |
| Post-operation | <0.001 b | | 2.29 (1.41-3.73) | 0.001 | |
| Brain injury | 0.589 | |  |  | |
| Use of nephrotoxic drugs a | 0.706 | |  |  | |
| Use of vasopressors | 0.150 | |  |  | |
| Use of ventilator | 0.996 | |  |  | |
| AKI stage (Stage3 vs others) | <0.001b | | 0.23 (0.13-0.42) | <0.001 | |
| CD26 level  (≥6.4% vs. 6.4%) | <0.001b | | 1.90 (1.15-3.14) | 0.012 | |

All variables were captured on ICU admission. Variables with p < 0.10 in univariable model were selected as covariates in Cox model. All variables that entered in Cox model were shown in the table.

HR, hazard ratio; APACHE II, Acute Physiology and Chronic Health Evaluation II; COPD, chronic obstructive pulmonary disease; AKI, acute kidney injury. a Nephrotoxic drugs include mannitol, vancomycin and contrast agents. b p < 0.10.
